# Supplementary material for: Regulation of lipid droplet and membrane biogenesis by the acidic tail of the phosphatidate phosphatase Pah1p
Source: PubMed Central journal article supplement — Mol Biol Cell. 2013 Jul 1;24(13):2124–33. doi: 10.1091/mbc.E13-01-0021 (PMC3694796; doi:10.1091/mbc.e13-01-0021), 2013-07-01
Supplement: supp_E13-01-0021v1_CombinedSupMats.pdf [file supp_E13-01-0021v1_CombinedSupMats.pdf]

# Supplemental Materials

*Molecular Biology of the Cell*

Karanasios et al.

**Table S1**

| Plasmid                               | Description                                                                                                      | Ref./source                        |
|---------------------------------------|------------------------------------------------------------------------------------------------------------------|------------------------------------|
| YCplac111-PAH1-PtA                    | PAH1-PtA under control of the PAH1 promoter in CEN/LEU2 vector                                                   | Santos-Rosa <i>et al.</i> , (2005) |
| pRS313-GAL1/10-NEM1-Myc               | NEM1-Myc under control of the GAL1/10 promoter in CEN/HIS3 vector                                                | This study                         |
| YEplac352-GAL1/10-SPO7                | SPO7 under control of the GAL1/10 promoter in 2 $\mu$ /URA3 vector                                               | This study                         |
| YCplac33-GAL1/10-NEM1                 | NEM1 under control of the GAL1/10 promoter into CEN/URA3 vector                                                  | Han <i>et al.</i> , (2008)         |
| pRS313-GAL1/10-SPO7                   | SPO7 under control of the GAL1/10 promoter into CEN/HIS3 vector                                                  | Han <i>et al.</i> , (2008)         |
| pASZ11-GAL1/10-NEM1                   | NEM1 under control of the GAL1/10 promoter into CEN/ADE2 vector                                                  | This study                         |
| YCplac111-PAH1 $\Delta$ 722-PtA       | PAH1-PtA C-terminal truncation ending at residue 722, under control of the PAH1 promoter in CEN/LEU2 vector      | This study                         |
| YCplac111-PAH1 $\Delta$ 664-PtA       | PAH1-PtA C-terminal truncation ending at residue 664, under control of the PAH1 promoter in CEN/LEU2 vector      | This study                         |
| YCplac111-PAH1 $\Delta$ 595-PtA       | PAH1-PtA C-terminal truncation ending at residue 595, under control of the PAH1 promoter in CEN/LEU2 vector      | This study                         |
| YCplac111-PAH1 $\Delta$ [3-109]-PtA   | PAH1-PtA lacking residues 4 to 108, under control of the PAH1 promoter in CEN/LEU2 vector                        | This study                         |
| YCplac111-PAH1 $\Delta$ [108-339]-PtA | PAH1-PtA lacking residues 109 to 338, under control of the PAH1 promoter into CEN/LEU2 vector                    | This study                         |
| YCplac111- PAH1 $\Delta$ 837-PtA      | PAH1-PtA C-terminal truncation ending at residue 837, under control of the PAH1 promoter into CEN/LEU2 vector    | This study                         |
| YCplac111- PAH1 $\Delta$ 798-PtA      | PAH1-PtA C-terminal truncation ending at residue 798, under control of the GAL1/10 promoter into CEN/LEU2 vector | This study                         |
| YCplac111- PAH1 $\Delta$ 755-PtA      | PAH1-PtA C-terminal truncation ending at residue 755, under control of the GAL1/10 promoter in CEN/LEU2 vector   | This study                         |
| YCplac111- PAH1 D3A-PtA               | PAH1-PtA with D851A D852A D853A mutations, under control of the PAH1 promoter into CEN/LEU2 vector               | This study                         |
| YCplac111- PAH1 D398A D400A-PtA       | PAH1-PtA with D398A D400A mutations, under control of the PAH1 promoter in CEN/LEU2 vector                       | This study                         |
| YCplac111- PAH1 G80R-PtA              | PAH1-PtA with G80R mutation, under control of the PAH1 promoter in CEN/LEU2 vector                               | This study                         |
| YCplac111-Lipin 2-PtA                 | Lipin 2 (mouse)-PtA, under control of the PAH1 promoter in CEN/LEU2 vector.                                      | This study                         |
| YCplac111-Lipin 2-Pah1ShortC-PtA      | Lipin 2 fused to the 26 C-terminal residues of Pah1p (837-862) and PtA,                                          | This study                         |

|                                                 |                                                                                                                                                    |                                    |
|-------------------------------------------------|----------------------------------------------------------------------------------------------------------------------------------------------------|------------------------------------|
|                                                 | under control of the <i>PAH1</i> promoter in <i>CEN/LEU2</i> vector.                                                                               |                                    |
| YEplac181-Lipin 2-Pah1LongC-PtA                 | Lipin 2 fused to the 277 C-terminal residues of Pah1p (586-862) and PtA, under control of the <i>PAH1</i> promoter in $2\mu$ / <i>LEU2</i> vector. | This study                         |
| YEplac195- P <sub>NOP1</sub> CTD1NEP1-Myc       | CTD1NEP1 (human)-Myc under the control of <i>NOP1</i> promoter in $2\mu$ / <i>URA3</i> vector                                                      | This study                         |
| pRS423- P <sub>NOP1</sub> NEP1R1                | NEP1R1 (human) under the control of <i>NOP1</i> promoter in $2\mu$ / <i>HIS3</i> vector                                                            | This study                         |
| YCplac111- <i>PAH1-GFP</i>                      | <i>PAH1-GFP</i> under control of the <i>PAH1</i> promoter in <i>CEN/LEU2</i> vector                                                                | Karanasios <i>et al.</i> , (2010)  |
| YCplac111- <i>PAH1</i> $\Delta$ 837- <i>GFP</i> | <i>PAH1</i> $\Delta$ 837- <i>GFP</i> under control of the <i>PAH1</i> promoter in <i>CEN/LEU2</i> vector                                           | This study                         |
| YCplac111-P <sub>NOP1</sub> <i>PAH1-GFP</i>     | <i>PAH1-GFP</i> under control of the <i>NOP1</i> promoter in <i>CEN/LEU2</i> vector                                                                | This study                         |
| YCplac111-P <sub>NOP1</sub> <i>AT-GFP</i>       | <i>PAH1</i> acidic tail residues (838-862)- <i>GFP</i> under the control of <i>NOP1</i> promoter in <i>CEN/LEU2</i> vector                         | This study                         |
| YCplac111-P <sub>NOP1</sub> - <i>GFP</i>        | <i>GFP</i> under control of <i>NOP1</i> promoter in <i>CEN/LEU2</i> plasmid                                                                        | This study                         |
| YCplac111- <i>PAH1</i>                          | <i>PAH1</i> under control of the <i>PAH1</i> promoter in <i>CEN/LEU2</i> vector                                                                    | Santos-Rosa <i>et al.</i> , (2005) |
| YCplac111- <i>PAH1</i> $\Delta$ 837             | <i>PAH1</i> $\Delta$ 837 under control of the <i>PAH1</i> promoter in <i>CEN/LEU2</i> vector                                                       | This study                         |
| YCplac111- <i>PAH1</i> D3A                      | <i>PAH1</i> with D851A D852A D853A mutations, under control of the <i>PAH1</i> promoter into <i>CEN/LEU2</i> vector                                | This study                         |
| YCplac111- <i>NEM1</i>                          | <i>NEM1</i> under control of the <i>NEM1</i> promoter in <i>CEN/LEU2</i> vector                                                                    | This study                         |
| YEplac181- <i>GAL1/10-PAH1</i>                  | <i>PAH1</i> under control of the <i>GAL1/10</i> promoter in $2\mu$ / <i>LEU2</i> vector                                                            | Santos-Rosa <i>et al.</i> , (2005) |
| YEplac181- <i>GAL1/10-PAH1-7A</i>               | <i>PAH1</i> 7A under control of the <i>GAL1/10</i> promoter in $2\mu$ / <i>LEU2</i> vector                                                         | O' Hara <i>et al.</i> , (2006)     |
| YEplac181- <i>GAL1/10-PAH1</i> $\Delta$ 837-7A  | <i>PAH1</i> $\Delta$ 837-7A under control of the <i>GAL1/10</i> promoter in $2\mu$ / <i>LEU2</i> vector                                            | This study                         |
| YCplac111- <i>PAH1</i> $\Delta$ 837-7A          | <i>PAH1</i> $\Delta$ 837-7A under control of the <i>PAH1</i> promoter in <i>CEN/LEU2</i> vector                                                    | This study                         |

Figure S1

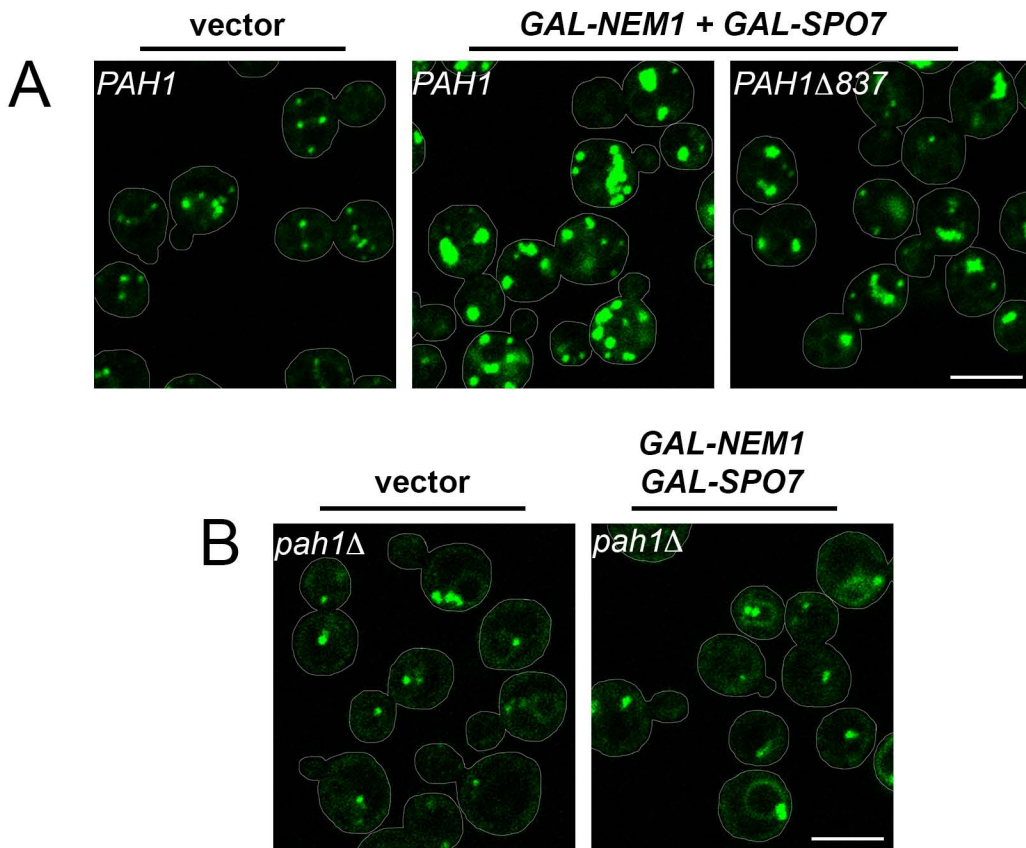

**Supplemental Figure 1.** Pah1p acidic tail-dependent changes in lipid droplet biogenesis visualized by BODIPY labeling. (A) *pah1Δ* cells expressing *PAH1* or *PAH1Δ837* were transformed with *GAL-NEM1* and *GAL-SPO7*, or the corresponding empty vectors, transferred from raffinose to galactose-containing medium and grown for five hours before imaging. Cells were labeled with BODIPY 493/503 and imaged by confocal microscopy. Representative single Z-plane for each strain is shown. Bar, 5 μm. (B) *pah1Δ* cells transformed with *GAL-NEM1* and *GAL-SPO7*, or the corresponding empty vectors, were grown in galactose-containing medium and imaged as in A. Bar, 5 μm. In all panels, the cell outlines are depicted.
